# Supplementary material
Source: publisher site journal article supplement (https://www.dovepress.com/article/218756)
Supplement: Supplementary file 1 [file get_supplementary_file.php]

**Supplementary data**

**Management of skin toxicity**

Rash management depends on the grade 1,7 :

**Grade 1**

BSA = Body Surface Area < 10%

Treatment strategies: sun avoidance, emollient creams, medium to strong topical steroids. ICI treatment should be continued.

**Grade 2**

10% < BSA < 30%

Treatment strategies: oral prednisone 0.5mg/kg, ICI treatment must be suspended if intolerable symptoms. If symptoms are tolerable, same management as a grade 1 event. ICI treatment can be restarted after symptoms return to grade 1 level.

**Grade 3**

BSA > 30%

Treatment strategies: oral prednisone 0.5 to 1mg/kg with tapering over 4 weeks. ICI treatment can be restarted after symptoms return to grade 1 level. Toxicity normally resolves in 2 to 6 weeks. A dermatological consultation and a skin biopsy are essential.

**Grade 4**

Diffuse rash, bullous, hemorrhagic, or necrotic evolution. Hospitalisation required

Treatment strategies: IV methylprednisolone 1-2mg/kg, rehydration, and IV antibiotics in the most severe cases. The continuation of ICI treatment is contraindicated.

To limit the risk of worsening, any skin toxicity that does not improve after 12 weeks of treatment should warrant suspension of ICI treatment.7

In cases of steroid-refractory toxicity, immunomodulatory therapy with infliximab, mycophenolate mofetil, or cyclophosphamide should be discussed.7

**Management of diarrheal toxicity**

Colitis management depends on grade 1,7, :

**Grade 1**

Less than 4 stools/day, no pain, no bleeding

Treatment strategies: decreased fiber intake, antidiarrheal treatment with loperamide (after exclusion of Clostridium Difficile). ICI treatment should be continued. Corticosteroid therapy with 0.5-1 mg/kg prednisolone can be discussed for grade 1 events > 14 days.

**Grade 2**

Less than 6 stools/day

Treatment strategies: same management as grade 1 but ICI treatment should be suspended. Oral corticosteroid therapy with 1 mg/kg prednisolone can be discussed for painful colitis or in cases of grade 2 toxicity lasting > 3 days. If a recto-sigmoidoscopy is organised, it should not delay the initiation of corticosteroid therapy. Corticosteroid therapy tapering must be obtained in 4 weeks. If performed, an abdominal CT scan typically shows a thickening of the intestinal wall and can highlight any complications. A lack of improvement after 3 days of corticosteroid therapy should be treated as a grade 3 event. The benefit and risks of restarting ICI treatment should be discussed with the patient.

**Grade 3**

More than 7 stools/day, incontinence, severe abdominal pain, ileus, fever

Treatment strategies: hospitalisation, fasting, corticosteroid therapy with 1-2 mg/kg IV methylprednisolone for 3 to 5 days, with tapering in less than 3 months. An Abdominal CT scan is necessary. Parenteral nutrition should be discussed and ICI treatment should be suspended. Immunomodulatory therapies with 5mg/kg infliximab (anti-TNF-α) should be considered for the most serious or unstable patients (but contraindicated if septic). Treatment with infliximab can be repeated 2 weeks later if necessary.

**Grade 4**

Digestive perforation, peritonitis

Treatment strategies: Surgical advice is required, especially if any digestive hemorrhage or colonic distension is observed. In the presence of perforated colitis or peritonitis, the extent of the lesions makes subtotal colectomy often necessary.

**Management of liver toxicity**

Hepatitis management depends on grade 1,7 :

**Grade 1**

Cytolysis < 3N or bilirubin < 1,5N)

Treatment strategies: Monitoring of liver function once a week. ICI treatment should be continued.

**Grade 2**

Cytolysis between 3 and 5N or bilirubin between 1.5 and 3N

Treatment Strategies: Viral and autoimmune check-up as well as an abdominal ultrasound are recommended. Oral corticosteroid therapy with1mg/kg prednisolone can be initiated prior to receiving serological results). Tapering must be obtained in less than 2 weeks and corticosteroid therapy should be increased to 2mg/kg if aggravated function. ICI treatment is suspended while prednisolone dose is above 10 mg/day. Hepatitis usually resolves in 4 to 6 weeks with the appropriate treatment.

**Grade 3**

Cytolysis > 5N or bilirubin > 3N

Treatment strategies: Consultation with a hepatologist and a liver biopsy are recommended. Corticosteroid IV therapy is necessary until return to a grade 2 toxicity. ICI treatment must be stopped and the recommendations about restarting are unclear.

**Management of hypophysitis toxicity**

Hypophysitis management depends on the symptomatology33:

**Asymptomatic hypophysitis or mild symptoms:**

Hormonal supplementation and ICI treatment must be continued. If cortisol levels at 8:00 AM are <250 nmol/l, supplementation with 50mg/day hydrocortisone should be initiated. L-Thyroxine supplementation should be initiated at a dose of 0.5-1 µg/kg and TSH should be dosed every 2 weeks. A new dosage of all hormonal lines is necessary before each infusion.

**Moderate to severe symptoms:**

Present as headache and visual disturbances. Corticosteroid therapy may be necessary in addition to hormone supplementation. ICI treatment should be discontinued. In rare cases, corticosteroid therapy could reduce the duration of supplementation.

**Lung toxicity management**

Pneumonitis management depends on grade 1,33:

**Grade 1**

Asymptomatic pneumonitis, incidental discovery on imagery

Treatment strategies: No specific recommendations. Corticosteroid therapy can be initiated. ICI treatment can be suspended while assessing clinical progress.

**Grade 2**

Respiratory symptoms

Treatment strategies: Consider hospitalisation and a chest CT scan. For outpatients, clinical assessment every 2 or 3 days with weekly chest X-rays is necessary. Functional respiratory investigations and bronchoalveolar lavages are also recommended. If no quick bronchoalveolar lavage is possible, 1-2 mg/kg oral or IV corticosteroid therapy must be initiated with antibiotic therapy if there is any suspicion of infection. Anti-infectious prophylaxis with trimethoprim-sulfamethoxazole is also possible for patients receiving corticosteroid therapy. Corticosteroid tapering must be obtained in 6 to 8 weeks and ICI treatment is suspended until a corticosteroid therapy dose of <10 mg/day.A lack of improvement after 48 hours must be treated as a grade 3 event.

**Grade 3**

Oxygen requirement

Treatment strategies: Hospitalisation is essential as well as IV corticosteroid therapy and antibiotics. Fibroscopy with bronchoalveolar lavage typically shows a lymphocytic inflammatory reaction. Pulmonary biopsy is generally not required, only if there is still a doubt about the etiology.Any worsening or lack of improvement after 48 hours warrants the use of other immunosuppressants (infliximab, mycophenolate mofetil, or cyclophosphamide). ICI treatment should be discontinued permanently.

**Grade 4**

Requires intubation

Treatment strategies: Intensive care management with IV corticosteroids and antibiotics.

**Management of rheumatological toxicity**

Arthritis management depends on the grade of the event 1:

**Grade 1**

Moderate pain

Treatment strategies: Efficient analgesia with paracetamol or non-steroidal anti-inflammatory drugs. ICI treatment should be continued.

**Grade 2**

Pain limits daily activities

Treatment strategies: Corticosteroid therapy with 10-20 mg/day prednisone if insufficient analgesia with the previous strategies. Intra-articular cortisone injections can be performed. The suspension of ICI treatment could be discussed for severe symptoms but the patient’s condition often improves after 2 days of anti-inflammatory therapies.

**Grade 3**

Destructive arthritis

Treatment strategies: Corticosteroid therapy with 0.5-1 mg/kg oral prednisolone. Rheumatology consultation and treatment with anti-TNF-α should be considered for the most severe cases.

**Management of kidney toxicity**

Tubulointerstitial nephritis management depends on the grade of the event 1 :

**Grade 1**

Creatinine < 1,5 x baseline, proteinuria < 1g/24h

Treatment strategy: Oral or IV rehydration as well as the suspension of nephrotoxic treatments are essential. Cytobacteriological examination of the urine and proteinuria must be performed. An obstructive cause must be eliminated with ultrasound. ICI treatment should be continued and creatinine level monitored weekly.

**Grade 2**

Creatinine > 1,5 x baseline, proteinuria < 3g/24h

Treatment strategies: Nephrology consult and hospitalisation are recommended. 0.5-1 mg/kg IV corticosteroid therapy should be initiated. Ionogram and creatinine levels should be monitored every 48 hours. ICI treatment has to be suspended while corticosteroid therapy is > 10 mg/day. In cases of hematuria associated with renal failure, a glomerulonephritis assessment is recommended.

**Grade 3**

Creatinine > 3 x baseline, proteinuria < 3,5g/24h

Treatment strategies: Hospitalisation is essential and IV corticosteroid therapy from 1-2 mg/kg must be initiated. A kidney biopsy for diagnostic confirmation may be considered. Biopsy typically shows the presence of tubulointerstitial nephritis with lymphocytic infiltrate.

**Grade 4**

Creatinine > 6 x baseline

Treatment strategies: Same management as grade 3 event.
